# Supplementary material for: Haploidentical vs sibling, unrelated, or cord blood hematopoietic cell transplantation for acute lymphoblastic leukemia
Source: PubMed Central journal article supplement — Blood Adv. 2022 Jan 11;6(1):339–57. doi: 10.1182/bloodadvances.2021004916 (PMC8753217; doi:10.1182/bloodadvances.2021004916), 2022-01-11

## Supplemental material

**Supplemental Table 1. Sensitivity analysis: Characteristics of patients receiving 1<sup>st</sup> MSD/ haploidentical /MUD/7/8 HLA-matched UD/UCB allogeneic HCT for ALL in CR between 2013-2017 restricted to myeloablative regimens and peripheral blood stem cell source**

| Characteristic                 | MSD        | Haplo      | MUD        | 7/8 UD     | UCB        |
|--------------------------------|------------|------------|------------|------------|------------|
| Number of patients             | 1091       | 164        | 985        | 131        | 228        |
| Number of centers              | 173        | 56         | 143        | 59         | 65         |
| Age at HCT (range)             | 40 (18-70) | 37 (18-67) | 39 (18-73) | 37 (18-63) | 34 (18-65) |
| Age at HCT                     |            |            |            |            |            |
| 18-29                          | 295 (27)   | 58 (35)    | 290 (29)   | 41 (31)    | 96 (42)    |
| 30-39                          | 245 (22)   | 32 (20)    | 222 (23)   | 36 (27)    | 52 (23)    |
| 40-49                          | 277 (25)   | 37 (23)    | 235 (24)   | 23 (18)    | 56 (25)    |
| 50-59                          | 221 (20)   | 30 (18)    | 167 (17)   | 29 (22)    | 20 (9)     |
| 60+                            | 53 (5)     | 7 (4)      | 71 (7)     | 2 (2)      | 4 (2)      |
| Karnofsky score                |            |            |            |            |            |
| <90                            | 339 (31)   | 60 (37)    | 348 (35)   | 33 (25)    | 73 (32)    |
| ≥90                            | 721 (66)   | 101 (62)   | 625 (63)   | 98 (75)    | 153 (67)   |
| Missing                        | 31 (3)     | 3 (2)      | 12 (1)     | 0          | 2 (<1)     |
| Gender                         |            |            |            |            |            |
| Male                           | 672 (62)   | 86 (52)    | 613 (62)   | 72 (55)    | 132 (58)   |
| Female                         | 419 (38)   | 78 (48)    | 372 (38)   | 59 (45)    | 96 (42)    |
| HCT-CI                         |            |            |            |            |            |
| 0                              | 388 (36)   | 40 (24)    | 254 (26)   | 33 (25)    | 70 (31)    |
| 1                              | 146 (13)   | 24 (15)    | 132 (13)   | 16 (12)    | 30 (13)    |
| 2                              | 165 (15)   | 24 (15)    | 186 (19)   | 25 (19)    | 31 (14)    |
| 3+                             | 367 (34)   | 76 (46)    | 410 (42)   | 57 (44)    | 94 (41)    |
| Missing                        | 25 (2)     | 0          | 3 (<1)     | 0          | 3 (1)      |
| Race                           |            |            |            |            |            |
| White hispanic                 | 184 (17)   | 41 (25)    | 100 (10)   | 28 (21)    | 49 (21)    |
| White non-hispanic             | 525 (48)   | 58 (35)    | 701 (71)   | 66 (50)    | 105 (46)   |
| Black                          | 44 (4)     | 31 (19)    | 39 (4)     | 9 (7)      | 20 (9)     |
| Asian                          | 73 (7)     | 9 (5)      | 32 (3)     | 7 (5)      | 18 (8)     |
| Other/not specified            | 265 (24)   | 25 (15)    | 113 (11)   | 21 (16)    | 36 (16)    |
| Immunophenotype                |            |            |            |            |            |
| T-cell                         | 140 (13)   | 11 (7)     | 127 (13)   | 16 (12)    | 26 (11)    |
| B-cell                         | 871 (80)   | 137 (84)   | 777 (79)   | 103 (79)   | 182 (80)   |
| Cytogenetic score <sup>b</sup> |            |            |            |            |            |
| Normal                         | 216 (20)   | 35 (21)    | 209 (21)   | 27 (21)    | 45 (20)    |
| Poor                           | 518 (47)   | 96 (59)    | 493 (50)   | 59 (45)    | 115 (50)   |
| Other                          | 184 (17)   | 26 (16)    | 188 (19)   | 23 (18)    | 53 (23)    |
| Not tested                     | 28 (3)     | 0          | 14 (1)     | 3 (2)      | 1 (<1)     |
| Missing                        | 145 (13)   | 7 (4)      | 81 (8)     | 19 (15)    | 14 (6)     |
| Unspecified                    | 80 (7)     | 16 (10)    | 81 (8)     | 12 (9)     | 20 (9)     |

| Characteristic                       | MSD      | Haplo    | MUD      | 7/8 UD   | UCB      |
|--------------------------------------|----------|----------|----------|----------|----------|
| Ph+/BCR-ABL1 status                  |          |          |          |          |          |
| No                                   | 487 (56) | 78 (57)  | 417 (54) | 55 (53)  | 93 (51)  |
| Yes                                  | 384 (44) | 59 (43)  | 360 (46) | 48 (47)  | 89 (49)  |
| Disease status                       |          |          |          |          |          |
| CR1- MRD positive                    | 367 (34) | 38 (23)  | 295 (30) | 34 (26)  | 59 (26)  |
| CR1- MRD negative                    | 410 (38) | 67 (41)  | 425 (43) | 50 (38)  | 85 (37)  |
| CR1- MRD missing                     | 93 (9)   | 6 (4)    | 41 (4)   | 4 (3)    | 7 (3)    |
| CR2                                  | 205 (19) | 46 (28)  | 197 (20) | 34 (26)  | 61 (27)  |
| ≥ CR3                                | 16 (1)   | 7 (4)    | 27 (3)   | 9 (7)    | 16 (7)   |
| Time from diagnosis to HCT(CR1-only) |          |          |          |          |          |
| 0-5 months                           | 589 (68) | 51 (46)  | 466 (61) | 32 (36)  | 65 (43)  |
| 6-11 months                          | 244 (28) | 48 (43)  | 268 (35) | 46 (52)  | 76 (50)  |
| ≥ 12 months                          | 37 (4)   | 12 (11)  | 27 (4)   | 10 (11)  | 10 (7)   |
| Cord blood type <sup>d</sup>         |          |          |          |          |          |
| Double cord, 4/6 HLA                 | 0        | 0        | 0        | 0        | 113 (50) |
| Double cord, 5-6/6 HLA               | 0        | 0        | 0        | 0        | 64 (28)  |
| Single cord, 4/6 HLA                 | 0        | 0        | 0        | 0        | 6 (3)    |
| Single cord, 5-6/6 HLA               | 0        | 0        | 0        | 0        | 21 (9)   |
| Single cord, missing HLA             | 0        | 0        | 0        | 0        | 24 (11)  |
| Missing                              | 1091     | 164      | 985      | 131      | 0        |
| Conditioning regimen                 |          |          |          |          |          |
| MAC-TBI                              | 798 (73) | 113 (69) | 730 (74) | 92 (70)  | 217 (95) |
| MAC-Chemo                            | 293 (27) | 51 (31)  | 255 (26) | 39 (30)  | 11 (5)   |
| Conditioning intensity/regimen       |          |          |          |          |          |
| MAC - TBI/Flud/Cy                    | 5 (<1)   | 8 (5)    | 5 (<1)   | 0        | 181 (79) |
| MAC - TBI/Flud                       | 50 (5)   | 95 (58)  | 34 (3)   | 9 (7)    | 21 (9)   |
| MAC - TBI/Cy                         | 572 (52) | 9 (5)    | 552 (56) | 67 (51)  | 13 (6)   |
| MAC - TBI/VP                         | 162 (15) | 0        | 127 (13) | 14 (11)  | 0        |
| MAC - TBI/Other                      | 9 (<1)   | 1 (<1)   | 12 (1)   | 2 (2)    | 2 (<1)   |
| MAC - Bu/Cy                          | 103 (9)  | 31 (19)  | 62 (6)   | 4 (3)    | 5 (2)    |
| MAC - Bu/Flud                        | 165 (15) | 20 (12)  | 170 (17) | 35 (27)  | 6 (3)    |
| MAC - Bu/Other                       | 25 (2)   | 0        | 23 (2)   | 0        | 0        |
| Donor/recipient sex match            |          |          |          |          |          |
| M-M                                  | 381 (35) | 55 (34)  | 440 (45) | 51 (39)  | 48 (21)  |
| M-F                                  | 221 (20) | 38 (23)  | 236 (24) | 38 (29)  | 9 (4)    |
| F-M                                  | 291 (27) | 31 (19)  | 172 (17) | 21 (16)  | 125 (55) |
| F-F                                  | 198 (18) | 40 (24)  | 134 (14) | 21 (16)  | 40 (18)  |
| Missing                              | 0        | 0        | 3 (<1)   | 0        | 6 (3)    |
| F-M gender mismatch vs. Other        |          |          |          |          |          |
| F-M gender mismatch                  | 291 (27) | 31 (19)  | 172 (17) | 21 (16)  | 125 (55) |
| All other gender matching            | 800 (73) | 133 (81) | 810 (82) | 110 (84) | 97 (43)  |
| Missing                              | 0        | 0        | 3 (<1)   | 0        | 6 (3)    |
| Donor/recipient CMV serostatus       |          |          |          |          |          |

| Characteristic                                | MSD        | Haplo      | MUD        | 7/8 UD     | UCB            |
|-----------------------------------------------|------------|------------|------------|------------|----------------|
| +/+                                           | 577 (53)   | 84 (51)    | 292 (30)   | 52 (40)    | 0              |
| +/-                                           | 101 (9)    | 12 (7)     | 119 (12)   | 12 (9)     | 0              |
| -/+                                           | 182 (17)   | 37 (23)    | 332 (34)   | 31 (24)    | 0              |
| -/-                                           | 212 (19)   | 30 (18)    | 235 (24)   | 35 (27)    | 0              |
| CB – Recipient +                              | 0          | 0          | 0          | 0          | 149 (65)       |
| CB – Recipient -                              | 0          | 0          | 0          | 0          | 75 (33)        |
| Missing                                       | 19 (2)     | 1 (<1)     | 7 (<1)     | 1 (<1)     | 4 (2)          |
| Donor age at donation <sup>c</sup>            |            |            |            |            |                |
| 0-17                                          | 38 (3)     | 6 (4)      | 0          | 0          | 0              |
| 18-29                                         | 223 (20)   | 55 (34)    | 579 (59)   | 60 (46)    | 0              |
| 30-39                                         | 217 (20)   | 38 (23)    | 224 (23)   | 34 (26)    | 0              |
| 40-49                                         | 240 (22)   | 23 (14)    | 130 (13)   | 30 (23)    | 0              |
| 50-59                                         | 199 (18)   | 31 (19)    | 41 (4)     | 7 (5)      | 0              |
| 60-69                                         | 66 (6)     | 7 (4)      | 0          | 0          | 0              |
| 70-79                                         | 3 (<1)     | 1 (<1)     | 0          | 0          | 0              |
| Missing                                       | 105 (10)   | 3 (2)      | 11 (1)     | 0          | 228            |
| Donor age, years                              | 41 (11-75) | 35 (10-74) | 28 (18-58) | 31 (19-60) | Not applicable |
| Type of graft source                          |            |            |            |            |                |
| Peripheral blood                              | 1091       | 164        | 985        | 131        | 0              |
| Cord blood                                    | 0          | 0          | 0          | 0          | 228            |
| Year of HCT                                   |            |            |            |            |                |
| 2013                                          | 234 (21)   | 5 (3)      | 163 (17)   | 26 (20)    | 53 (23)        |
| 2014                                          | 231 (21)   | 14 (9)     | 197 (20)   | 31 (24)    | 49 (21)        |
| 2015                                          | 224 (21)   | 29 (18)    | 207 (21)   | 35 (27)    | 53 (23)        |
| 2016                                          | 198 (18)   | 48 (29)    | 205 (21)   | 14 (11)    | 39 (17)        |
| 2017                                          | 204 (19)   | 68 (41)    | 213 (22)   | 25 (19)    | 34 (15)        |
| GVHD prophylaxis                              |            |            |            |            |                |
| TAC/CSA + MMF ± others                        | 112 (10)   | 0          | 66 (7)     | 8 (6)      | 204 (89)       |
| TAC/CSA + MTX ± others                        | 808 (74)   | 0          | 752 (76)   | 95 (73)    | 6 (3)          |
| TAC/CSA others                                | 94 (9)     | 0          | 99 (10)    | 9 (7)      | 3 (1)          |
| TAC/CSA alone                                 | 32 (3)     | 0          | 28 (3)     | 3 (2)      | 12 (5)         |
| Post-cy + TAC/CSA ± MMF                       | 29 (3)     | 164        | 30 (3)     | 15 (11)    | 2 (<1)         |
| Other prophylaxis                             | 10 (<1)    | 0          | 6 (<1)     | 0          | 1 (<1)         |
| Missing                                       | 6 (<1)     | 0          | 4 (<1)     | 1 (<1)     | 0              |
| ATG/Campath                                   |            |            |            |            |                |
| ATG alone                                     | 51 (5)     | 0          | 353 (36)   | 81 (62)    | 23 (10)        |
| CAMPATH alone                                 | 5 (<1)     | 0          | 24 (2)     | 4 (3)      | 0              |
| No ATG or CAMPATH                             | 1023 (94)  | 164        | 599 (61)   | 43 (33)    | 205 (90)       |
| Missing                                       | 12 (1)     | 0          | 9 (<1)     | 3 (2)      | 0              |
| Median follow-up of survivors (range), months | 30 (3-72)  | 24 (6-58)  | 33 (3-74)  | 36 (3-64)  | 35 (3-64)      |

<sup>a</sup>**Other/ not specified:** Native American (n=30), Pacific Islander (n=20), Non-resident of the US (n=226), not specified (n= 99), Hispanic – excluding white Hispanic (n= 135)

<sup>b</sup>**CIBMTR cytogenetics criteria definition:** Poor: Ph+/t(9:22), t(4:11), 11q23, MLL, hypodiploid (<45), t(8:14), complex(≥ 3 abnormalities), iAMP21; Normal: without any abnormality; Other: abnormality count 1 or 2 abnormalities.

<sup>c</sup>**Donor age** is not reported for cord bloods.

**4Cord Blood type:** Double CB, worst HLA-match was selected

**Supplemental Table 2. Sensitivity analysis: Characteristics of United States centers only patients receiving 1st MSD/ haploidentical /MUD/7/8 HLA-matched UD/UCB allogeneic HCT for ALL in CR between 2013-2017**

| <b>Characteristic</b>          | <b>MSD</b> | <b>Haplo</b> | <b>MUD</b> | <b>7/8 UD</b> | <b>UCB</b> |
|--------------------------------|------------|--------------|------------|---------------|------------|
| Number of patients             | 1113       | 356          | 1501       | 203           | 273        |
| Number of centers              | 131        | 79           | 131        | 71            | 61         |
| Median (range)                 | 45 (18-75) | 43 (18-74)   | 44 (18-77) | 38 (18-70)    | 38 (18-70) |
| Age at HCT                     |            |              |            |               |            |
| 18-29                          | 251 (23)   | 102 (29)     | 366 (24)   | 70 (34)       | 93 (34)    |
| 30-39                          | 195 (18)   | 52 (15)      | 273 (18)   | 39 (19)       | 59 (22)    |
| 40-49                          | 250 (22)   | 74 (21)      | 287 (19)   | 30 (15)       | 61 (22)    |
| 50-59                          | 269 (24)   | 70 (20)      | 284 (19)   | 45 (22)       | 40 (15)    |
| 60+                            | 148 (13)   | 58 (16)      | 291 (19)   | 19 (9)        | 20 (7)     |
| Karnofsky score                |            |              |            |               |            |
| <90                            | 431 (39)   | 145 (41)     | 593 (40)   | 60 (30)       | 98 (36)    |
| ≥90                            | 674 (61)   | 203 (57)     | 892 (59)   | 142 (70)      | 174 (64)   |
| Missing                        | 8 (<1)     | 8 (2)        | 16 (1)     | 1 (<1)        | 1 (<1)     |
| Gender                         |            |              |            |               |            |
| Male                           | 650 (58)   | 189 (53)     | 888 (59)   | 124 (61)      | 157 (58)   |
| Female                         | 463 (42)   | 167 (47)     | 613 (41)   | 79 (39)       | 116 (42)   |
| HCT-CI                         |            |              |            |               |            |
| 0                              | 281 (25)   | 56 (16)      | 315 (21)   | 36 (18)       | 71 (26)    |
| 1                              | 154 (14)   | 54 (15)      | 203 (14)   | 34 (17)       | 38 (14)    |
| 2                              | 191 (17)   | 60 (17)      | 256 (17)   | 35 (17)       | 44 (16)    |
| 3+                             | 487 (44)   | 186 (52)     | 725 (48)   | 98 (48)       | 120 (44)   |
| Missing                        | 0          | 0            | 2 (<1)     | 0             | 0          |
| Race                           |            |              |            |               |            |
| White hispanic                 | 230 (21)   | 85 (24)      | 135 (9)    | 42 (21)       | 63 (23)    |
| White non-hispanic             | 648 (58)   | 152 (43)     | 1164 (78)  | 103 (51)      | 139 (51)   |
| Black                          | 60 (5)     | 58 (16)      | 51 (3)     | 19 (9)        | 26 (10)    |
| Asian                          | 64 (6)     | 20 (6)       | 52 (3)     | 8 (4)         | 17 (6)     |
| Other/not specified            | 111 (10)   | 41 (12)      | 99 (7)     | 31 (15)       | 28 (10)    |
| Immunophenotype                |            |              |            |               |            |
| T-cell                         | 109 (10)   | 22 (6)       | 168 (11)   | 20 (10)       | 32 (12)    |
| B-cell                         | 935 (84)   | 299 (84)     | 1207 (80)  | 166 (82)      | 220 (81)   |
| Unspecified                    | 69 (6)     | 35 (10)      | 126 (8)    | 17 (8)        | 21 (8)     |
| Cytogenetic score <sup>b</sup> |            |              |            |               |            |
| Normal                         | 196 (18)   | 78 (22)      | 298 (20)   | 46 (23)       | 59 (22)    |
| Poor                           | 570 (51)   | 209 (59)     | 787 (52)   | 94 (46)       | 134 (49)   |
| Other                          | 217 (19)   | 55 (15)      | 291 (19)   | 33 (16)       | 65 (24)    |
| Not tested                     | 10 (<1)    | 1 (<1)       | 8 (<1)     | 1 (<1)        | 1 (<1)     |
| Missing                        | 120 (11)   | 13 (4)       | 117 (8)    | 29 (14)       | 14 (5)     |
| Disease status                 |            |              |            |               |            |

| Characteristic                       | MSD      | Haplo    | MUD      | 7/8 UD   | UCB      |
|--------------------------------------|----------|----------|----------|----------|----------|
| CR1- MRD positive                    | 374 (34) | 100 (28) | 467 (31) | 53 (26)  | 70 (26)  |
| CR1- MRD negative                    | 472 (42) | 132 (37) | 645 (43) | 75 (37)  | 115 (42) |
| CR1- MRD missing                     | 43 (4)   | 10 (3)   | 46 (3)   | 4 (2)    | 5 (2)    |
| CR2                                  | 210 (19) | 95 (27)  | 297 (20) | 56 (28)  | 65 (24)  |
| ≥ CR3                                | 14 (1)   | 19 (5)   | 46 (3)   | 15 (7)   | 18 (7)   |
| Time from diagnosis to HCT(CR1-only) |          |          |          |          |          |
| 0-5 months                           | 602 (68) | 123 (51) | 699 (60) | 51 (39)  | 83 (44)  |
| 6-11 months                          | 247 (28) | 99 (41)  | 412 (36) | 71 (54)  | 93 (49)  |
| ≥ 12 months                          | 40 (4)   | 20 (8)   | 47 (4)   | 10 (8)   | 14 (7)   |
| Cord blood type <sup>d</sup>         |          |          |          |          |          |
| Double cord, 4/6 HLA                 | 0        | 0        | 0        | 0        | 127 (47) |
| Double cord, 5-6/6 HLA               | 0        | 0        | 0        | 0        | 98 (36)  |
| Single cord, 4/6 HLA                 | 0        | 0        | 0        | 0        | 7 (3)    |
| Single cord, 5-6/6 HLA               | 0        | 0        | 0        | 0        | 21 (8)   |
| Single cord, missing HLA             | 0        | 0        | 0        | 0        | 18 (7)   |
| Missing                              | 1113     | 356      | 1501     | 203      | 2 (<1)   |
| Conditioning regimen                 |          |          |          |          |          |
| MAC-TBI                              | 649 (58) | 147 (41) | 851 (57) | 122 (60) | 195 (71) |
| MAC-Chemo                            | 240 (22) | 49 (14)  | 291 (19) | 46 (23)  | 5 (2)    |
| RIC/NMA                              | 222 (20) | 160 (45) | 359 (24) | 34 (17)  | 72 (26)  |
| Missing                              | 2 (<1)   | 0        | 0        | 1 (<1)   | 1 (<1)   |
| Conditioning intensity/regimen       |          |          |          |          |          |
| MAC - TBI/Flud/Cy                    | 4 (<1)   | 9 (3)    | 8 (<1)   | 3 (1)    | 164 (60) |
| MAC - TBI/Flud                       | 16 (1)   | 110 (31) | 23 (2)   | 9 (4)    | 18 (7)   |
| MAC - TBI/Cy                         | 462 (42) | 26 (7)   | 664 (44) | 91 (45)  | 11 (4)   |
| MAC - TBI/VP                         | 157 (14) | 0        | 144 (10) | 15 (7)   | 0        |
| MAC - TBI/Other                      | 10 (<1)  | 2 (<1)   | 12 (<1)  | 4 (2)    | 2 (<1)   |
| MAC - Bu/Cy                          | 80 (7)   | 29 (8)   | 62 (4)   | 9 (4)    | 3 (1)    |
| MAC - Bu/Flud                        | 136 (12) | 20 (6)   | 187 (12) | 36 (18)  | 2 (<1)   |
| MAC- Bu/Other                        | 24 (2)   | 0        | 42 (3)   | 1 (<1)   | 0        |
| RIC/NMA - TBI/Other                  | 10 (<1)  | 0        | 4 (<1)   | 3 (1)    | 0        |
| RIC/NMA - Bu/Flud                    | 39 (4)   | 0        | 80 (5)   | 7 (3)    | 1 (<1)   |
| RIC/NMA - Mel/Flud                   | 115 (10) | 12 (3)   | 181 (12) | 11 (5)   | 9 (3)    |
| RIC/NMA - TBI/Flud/Cy                | 17 (2)   | 135 (38) | 20 (1)   | 8 (4)    | 57 (21)  |
| RIC/NMA - TBI/Flud                   | 41 (4)   | 13 (4)   | 74 (5)   | 5 (2)    | 5 (2)    |
| Missing                              | 2 (<1)   | 0        | 0        | 1 (<1)   | 1 (<1)   |
| Donor/recipient sex match            |          |          |          |          |          |
| M-M                                  | 356 (32) | 115 (32) | 668 (45) | 84 (41)  | 66 (24)  |
| M-F                                  | 238 (21) | 85 (24)  | 394 (26) | 44 (22)  | 9 (3)    |
| F-M                                  | 294 (26) | 74 (21)  | 218 (15) | 40 (20)  | 146 (53) |
| F-F                                  | 225 (20) | 82 (23)  | 216 (14) | 35 (17)  | 48 (18)  |
| Missing                              | 0        | 0        | 5 (<1)   | 0        | 4 (1)    |
| F-M gender mismatch vs. Other        |          |          |          |          |          |
| F-M gender mismatch                  | 294 (26) | 74 (21)  | 218 (15) | 40 (20)  | 146 (53) |

| Characteristic                                | MSD       | Haplo      | MUD        | 7/8 UD     | UCB            |
|-----------------------------------------------|-----------|------------|------------|------------|----------------|
| All other gender matching                     | 819 (74)  | 282 (79)   | 1278 (85)  | 163 (80)   | 123 (45)       |
| Missing                                       | 0         | 0          | 5 (<1)     | 0          | 4 (1)          |
| Donor/recipient CMV serostatus                |           |            |            |            |                |
| +/+                                           | 519 (47)  | 175 (49)   | 451 (30)   | 79 (39)    | 0              |
| +/-                                           | 120 (11)  | 29 (8)     | 185 (12)   | 23 (11)    | 0              |
| -/+                                           | 226 (20)  | 81 (23)    | 513 (34)   | 56 (28)    | 0              |
| -/-                                           | 236 (21)  | 70 (20)    | 345 (23)   | 45 (22)    | 0              |
| CB – Recipient +                              | 0         | 0          | 0          | 0          | 181 (66)       |
| CB – Recipient -                              | 0         | 0          | 0          | 0          | 88 (32)        |
| Missing                                       | 12 (1)    | 1 (<1)     | 7 (<1)     | 0          | 4 (1)          |
| Donor age at donation <sup>c</sup>            |           |            |            |            |                |
| 0-17                                          | 45 (4)    | 14 (4)     | 0          | 0          | 0              |
| 18-29                                         | 194 (17)  | 118 (33)   | 916 (61)   | 93 (46)    | 0              |
| 30-39                                         | 185 (17)  | 79 (22)    | 331 (22)   | 57 (28)    | 0              |
| 40-49                                         | 227 (20)  | 72 (20)    | 180 (12)   | 43 (21)    | 0              |
| 50-59                                         | 253 (23)  | 49 (14)    | 57 (4)     | 8 (4)      | 0              |
| 60-69                                         | 111 (10)  | 16 (4)     | 0          | 0          | 0              |
| 70-79                                         | 9 (<1)    | 1 (<1)     | 0          | 0          | 0              |
| Missing                                       | 89 (8)    | 7 (2)      | 17 (1)     | 2 (<1)     | 273            |
| Donor age, years                              | 44 (9-75) | 35 (10-74) | 28 (18-58) | 31 (19-60) | Not applicable |
| Type of graft source                          |           |            |            |            |                |
| Bone marrow                                   | 122 (11)  | 142 (40)   | 285 (19)   | 62 (31)    | 0              |
| Peripheral blood                              | 991 (89)  | 214 (60)   | 1216 (81)  | 141 (69)   | 0              |
| Cord blood                                    | 0         | 0          | 0          | 0          | 273            |
| Year of HCT                                   |           |            |            |            |                |
| 2013                                          | 227 (20)  | 26 (7)     | 258 (17)   | 38 (19)    | 58 (21)        |
| 2014                                          | 229 (21)  | 47 (13)    | 289 (19)   | 44 (22)    | 64 (23)        |
| 2015                                          | 234 (21)  | 72 (20)    | 315 (21)   | 46 (23)    | 63 (23)        |
| 2016                                          | 218 (20)  | 97 (27)    | 302 (20)   | 32 (16)    | 46 (17)        |
| 2017                                          | 205 (18)  | 114 (32)   | 337 (22)   | 43 (21)    | 42 (15)        |
| GVHD prophylaxis                              |           |            |            |            |                |
| TAC/CSA + MMF ± others                        | 143 (13)  | 0          | 175 (12)   | 16 (8)     | 243 (89)       |
| TAC/CSA + MTX ± others                        | 751 (67)  | 0          | 1042 (69)  | 140 (69)   | 7 (3)          |
| TAC/CSA others                                | 116 (10)  | 0          | 141 (9)    | 12 (6)     | 6 (2)          |
| TAC/CSA alone                                 | 39 (4)    | 0          | 54 (4)     | 5 (2)      | 5 (2)          |
| Post-cy + TAC/CSA ± MMF                       | 50 (4)    | 356        | 73 (5)     | 28 (14)    | 2 (<1)         |
| Other prophylaxis                             | 8 (<1)    | 0          | 12 (<1)    | 1 (<1)     | 9 (3)          |
| Missing                                       | 6 (<1)    | 0          | 4 (<1)     | 1 (<1)     | 1 (<1)         |
| ATG/Campath                                   |           |            |            |            |                |
| ATG alone                                     | 24 (2)    | 1 (<1)     | 461 (31)   | 96 (47)    | 31 (11)        |
| CAMPATH alone                                 | 17 (2)    | 0          | 56 (4)     | 6 (3)      | 0              |
| No ATG or CAMPATH                             | 1064 (96) | 355        | 972 (65)   | 99 (49)    | 241 (88)       |
| Missing                                       | 8 (<1)    | 0          | 12 (<1)    | 2 (<1)     | 1 (<1)         |
| Median follow-up of survivors (range), months | 36 (3-72) | 25 (5-67)  | 36 (3-74)  | 36 (3-64)  | 36 (3-64)      |

<sup>a</sup>**Other/ not specified:** Native American (n=24), Pacific Islander (n=12), Non-resident of the US (n=5), not specified (n= 111), Hispanic – excluding white Hispanic (n= 194)

<sup>b</sup>**CIBMTR cytogenetics criteria definition:** Poor: Ph+/t(9:22), t(4:11), 11q23, MLL, hypodiploid (<45), t(8:14), complex( $\geq$  3 abnormalities), iAMP21; Normal: without any abnormality; Other: abnormality count 1 or 2 abnormalities.

<sup>c</sup>**Donor age** is not reported for cord bloods.

<sup>d</sup>**Cord Blood type:** Double CB, worst HLA-match was selected



**Supplemental Table 3. Univariate outcomes, 2013-2017**

| Outcomes | MSD<br>(N = 1627) |                          | Haploidentical<br>(N = 393) |                          | MUD<br>(N = 1646) |                          | 7/8 HLA-<br>matched UD<br>(N = 230) |                          | UCB<br>(N = 305) |                          | P<br>Value |
|----------|-------------------|--------------------------|-----------------------------|--------------------------|-------------------|--------------------------|-------------------------------------|--------------------------|------------------|--------------------------|------------|
|          | N                 | Prob<br>(95% CI)         | N                           | Prob<br>(95% CI)         | N                 | Prob<br>(95% CI)         | N                                   | Prob<br>(95% CI)         | N                | Prob<br>(95% CI)         |            |
| NRM      | 1583              |                          | 381                         |                          | 1618              |                          | 227                                 |                          | 291              |                          | <0.001     |
| 1-year   |                   | 12.4<br>(10.8-<br>14.1)% |                             | 12.6 (9.5-<br>16.1)%     |                   | 15.3<br>(13.6-<br>17.1)% |                                     | 24.9<br>(19.4-<br>30.7)% |                  | 25<br>(20.2-<br>30.2)%   | <0.001     |
| 2-year   |                   | 15.3<br>(13.5-<br>17.2)% |                             | 15.7<br>(12.1-<br>19.6)% |                   | 20.2<br>(18.3-<br>22.2)% |                                     | 29.7<br>(23.8-<br>35.9)% |                  | 27.7<br>(22.6-<br>33)%   | <0.001     |
| Relapse  | 1583              |                          | 381                         |                          | 1618              |                          | 227                                 |                          | 291              |                          | <0.001     |
| 1-year   |                   | 22.1<br>(20-<br>24.2)%   |                             | 24.5<br>(20.3-<br>29)%   |                   | 18.5<br>(16.7-<br>20.5)% |                                     | 18.7<br>(13.9-<br>24.1)% |                  | 17.9<br>(13.6-<br>22.5)% | 0.023      |
| 2-year   |                   | 28.9<br>(26.6-<br>31.3)% |                             | 31.5<br>(26.8-<br>36.4)% |                   | 23.8<br>(21.8-<br>26)%   |                                     | 21.6<br>(16.4-<br>27.3)% |                  | 22.3<br>(17.7-<br>27.4)% | <0.001     |
| LFS      | 1583              |                          | 381                         |                          | 1618              |                          | 227                                 |                          | 291              |                          | 0.095      |
| 1-year   |                   | 65.5<br>(63.1-<br>67.9)% |                             | 62.8<br>(57.9-<br>67.6)% |                   | 66.2<br>(63.8-<br>68.5)% |                                     | 56.4<br>(49.9-<br>62.8)% |                  | 57.1<br>(51.3-<br>62.8)% | 0.004      |
| 2-year   |                   | 55.8<br>(53.2-<br>58.3)% |                             | 52.8<br>(47.7-<br>58)%   |                   | 55.9<br>(53.5-<br>58.4)% |                                     | 48.7<br>(42.2-<br>55.3)% |                  | 50<br>(44.1-<br>55.8)%   | 0.101      |
| OS       | 1627              |                          | 393                         |                          | 1646              |                          | 230                                 |                          | 305              |                          | 0.018      |
| 1-year   |                   | 75.1<br>(72.9-<br>77.2)% |                             | 77.5<br>(73.3-<br>81.5)% |                   | 75.7<br>(73.6-<br>77.8)% |                                     | 64<br>(57.7-<br>70.1)%   |                  | 67.2<br>(61.7-<br>72.4)% | <0.001     |
| 2-year   |                   | 65.2<br>(62.7-<br>67.7)% |                             | 65.8<br>(60.9-<br>70.6)% |                   | 64.1<br>(61.7-<br>66.5)% |                                     | 55.4<br>(48.9-<br>61.9)% |                  | 57.4<br>(51.6-<br>63)%   | 0.010      |

**Supplemental Table 4. Univariate outcomes. Sensitivity analysis for myeloablative conditioning and peripheral blood stem cell source only, 2013-2017**

| Outcomes | MSD<br>(N = 1091) |                          | Haploidentical<br>(N = 164) |                          | MUD<br>(N = 985) |                          | 7/8 HLA-<br>matched UD<br>(N = 131) |                          | UCB<br>(N = 228) |                          | P<br>Value |
|----------|-------------------|--------------------------|-----------------------------|--------------------------|------------------|--------------------------|-------------------------------------|--------------------------|------------------|--------------------------|------------|
|          | N                 | Prob<br>(95% CI)         | N                           | Prob<br>(95% CI)         | N                | Prob<br>(95% CI)         | N                                   | Prob<br>(95% CI)         | N                | Prob<br>(95% CI)         |            |
| NRM      | 1061              |                          | 159                         |                          | 965              |                          | 129                                 |                          | 217              |                          | <0.001     |
| 1-year   |                   | 11.6<br>(9.7-<br>13.6)%  |                             | 15.1 (10-<br>21.1)%      |                  | 14.2<br>(12-<br>16.5)%   |                                     | 25.8<br>(18.6-<br>33.8)% |                  | 28.6<br>(22.7-<br>34.8)% | <0.001     |
| 2-year   |                   | 14.7<br>(12.5-<br>16.9)% |                             | 19.5<br>(13.6-<br>26.1)% |                  | 19.5<br>(17-<br>22.1)%   |                                     | 29.2<br>(21.5-<br>37.4)% |                  | 30.1<br>(24.1-<br>36.5)% | <0.001     |
| Relapse  | 1061              |                          | 159                         |                          | 965              |                          | 129                                 |                          | 217              |                          | <0.001     |
| 1-year   |                   | 21.7<br>(19.2-<br>24.2)% |                             | 20.2<br>(14.3-<br>26.8)% |                  | 16.9<br>(14.6-<br>19.3)% |                                     | 16.5<br>(10.5-<br>23.4)% |                  | 12.8<br>(8.7-<br>17.7)%  | 0.006      |
| 2-year   |                   | 27.6<br>(24.9-<br>30.5)% |                             | 24.7<br>(18.2-<br>31.9)% |                  | 22.3<br>(19.7-<br>25)%   |                                     | 19<br>(12.6-<br>26.3)%   |                  | 18.4<br>(13.4-<br>24)%   | 0.006      |
| LFS      | 1061              |                          | 159                         |                          | 965              |                          | 129                                 |                          | 217              |                          | 0.401      |
| 1-year   |                   | 66.7<br>(63.8-<br>69.6)% |                             | 64.7<br>(57.1-<br>72)%   |                  | 68.9<br>(66-<br>71.8)%   |                                     | 57.7<br>(49-<br>66.1)%   |                  | 58.6<br>(51.9-<br>65.1)% | 0.015      |
| 2-year   |                   | 57.7<br>(54.6-<br>60.8)% |                             | 55.8<br>(47.8-<br>63.6)% |                  | 58.2<br>(55-<br>61.4)%   |                                     | 51.8<br>(43.1-<br>60.5)% |                  | 51.5<br>(44.7-<br>58.2)% | 0.319      |
| OS       | 1091              |                          | 164                         |                          | 985              |                          | 131                                 |                          | 228              |                          | 0.115      |
| 1-year   |                   | 75.5<br>(72.9-<br>78.1)% |                             | 75 (68.1-<br>81.3)%      |                  | 77.3<br>(74.7-<br>79.9)% |                                     | 62.2<br>(53.7-<br>70.3)% |                  | 65.9<br>(59.5-<br>71.9)% | <0.001     |
| 2-year   |                   | 65.7<br>(62.7-<br>68.6)% |                             | 63.7 (56-<br>71.1)%      |                  | 65.9<br>(62.8-<br>68.9)% |                                     | 55.5<br>(46.8-<br>64)%   |                  | 59<br>(52.4-<br>65.4)%   | 0.082      |

**Supplemental Table 5. Univariate outcomes. Sensitivity analysis for United States centers only**

| Outcomes | HLA-id sib (N = 1113) |                   | Haplo (N = 356) |                   | 8/8 MUD (N = 1501) |                   | 7/8 MUD (N = 203) |                   | Cord blood (N = 273) |                   | P Value |
|----------|-----------------------|-------------------|-----------------|-------------------|--------------------|-------------------|-------------------|-------------------|----------------------|-------------------|---------|
|          | N                     | Prob (95% CI)     | N               | Prob (95% CI)     | N                  | Prob (95% CI)     | N                 | Prob (95% CI)     | N                    | Prob (95% CI)     |         |
| TRM      | 1101                  |                   | 344             |                   | 1482               |                   | 200               |                   | 265                  |                   | <0.001  |
| 1-year   |                       | 12.2 (10.3-14.2)% |                 | 11.1 (8-14.6)%    |                    | 15.2 (13.4-17.1)% |                   | 24.1 (18.4-30.4)% |                      | 25.4 (20.3-30.8)% | <0.001  |
| 2-year   |                       | 15.6 (13.5-17.8)% |                 | 14 (10.5-18)%     |                    | 20.3 (18.3-22.4)% |                   | 28.9 (22.8-35.4)% |                      | 28.1 (22.8-33.7)% | <0.001  |
| Relapse  | 1101                  |                   | 344             |                   | 1482               |                   | 200               |                   | 265                  |                   | <0.001  |
| 1-year   |                       | 21.9 (19.5-24.4)% |                 | 25.7 (21.2-30.4)% |                    | 18.2 (16.3-20.3)% |                   | 18.1 (13.1-23.8)% |                      | 18.2 (13.8-23.1)% | 0.016   |
| 2-year   |                       | 29 (26.3-31.7)%   |                 | 33.3 (28.3-38.4)% |                    | 23.6 (21.5-25.9)% |                   | 21.3 (15.9-27.3)% |                      | 22.9 (18-28.2)%   | <0.001  |
| LFS      | 1101                  |                   | 344             |                   | 1482               |                   | 200               |                   | 265                  |                   | 0.188   |
| 1-year   |                       | 65.9 (63-68.6)%   |                 | 63.3 (58.1-68.3)% |                    | 66.5 (64.1-68.9)% |                   | 57.7 (50.8-64.5)% |                      | 56.4 (50.4-62.4)% | 0.006   |
| 2-year   |                       | 55.4 (52.4-58.4)% |                 | 52.7 (47.3-58.1)% |                    | 56 (53.5-58.6)%   |                   | 49.8 (42.8-56.8)% |                      | 49 (43-55.1)%     | 0.133   |
| OS       | 1113                  |                   | 356             |                   | 1501               |                   | 203               |                   | 273                  |                   | 0.039   |
| 1-year   |                       | 76.4 (73.9-78.9)% |                 | 78.6 (74.2-82.7)% |                    | 76.4 (74.3-78.6)% |                   | 65.8 (59.1-72.2)% |                      | 67.3 (61.6-72.7)% | <0.001  |
| 2-year   |                       | 66.3 (63.5-69.1)% |                 | 66.2 (61.1-71.2)% |                    | 64.5 (62-67)%     |                   | 57.4 (50.5-64.2)% |                      | 57 (51-62.9)%     | 0.016   |

**Supplemental Table 6. Multivariate sensitivity analysis for matched-sibling donor (MSD) vs. haploidentical HCT, myeloablative conditioning regimens and peripheral blood stem cell source only, 2013-2017.**

| <b>Covariates</b>     | <b>N</b> | <b>HR (95% CI)</b> | <b>p-value</b> |
|-----------------------|----------|--------------------|----------------|
| <b><u>OS</u></b>      |          |                    |                |
| Main effect           |          |                    | 0.99           |
| Haploidentical        | 164      | Reference          |                |
| MSD                   | 1091     | 1.00 (0.76-1.31)   | 0.99           |
| <b><u>LFS</u></b>     |          |                    |                |
| Main effect           |          |                    | 0.98           |
| Haploidentical        | 159      | Reference          |                |
| MSD                   | 1061     | 1.00 (0.78-1.27)   | 0.98           |
| <b><u>NRM</u></b>     |          |                    |                |
| Main effect           |          |                    | 0.19           |
| Haploidentical        | 159      | Reference          |                |
| MSD                   | 1061     | 0.77 (0.53-1.13)   | 0.19           |
| <b><u>Relapse</u></b> |          |                    |                |
| Main effect           |          |                    | 0.46           |
| Haploidentical        | 159      | Reference          |                |
| MSD                   | 1061     | 1.13 (0.82-1.55)   | 0.46           |

**Supplemental Table 7. Multivariate sensitivity analysis for 8/8 HLA-matched unrelated donor (MUD) vs. haploidentical HCT, myeloablative conditioning regimens and peripheral blood stem cell source only, 2013-2017.**

| <b>Covariates</b>     | <b>N</b> | <b>HR (95% CI)</b> | <b>p-value</b> |
|-----------------------|----------|--------------------|----------------|
| <b><u>OS</u></b>      |          |                    |                |
| Main effect           |          |                    | 0.71           |
| Haploidentical        | 164      | Reference          |                |
| MUD                   | 985      | 1.06 (0.79-1.41)   | 0.71           |
| <b><u>LFS</u></b>     |          |                    |                |
| Main effect           |          |                    | 0.97           |
| Haploidentical        | 159      | Reference          |                |
| MUD                   | 965      | 1.00 (0.77-1.29)   | 0.97           |
| <b><u>NRM</u></b>     |          |                    |                |
| Main effect           |          |                    | 0.53           |
| Haploidentical        | 159      | Reference          |                |
| MUD                   | 965      | 1.14 (0.76-1.69)   | 0.53           |
| <b><u>Relapse</u></b> |          |                    |                |
| Main effect           |          |                    | 0.57           |
| Haploidentical        | 159      | Reference          |                |
| MUD                   | 965      | 0.90 (0.64-1.28)   | 0.57           |

**Supplemental Table 8. Multivariate sensitivity analysis (MAC / PBSC) for 7/8 HLA-matched unrelated donor (UD) vs. haploidentical HCT, myeloablative conditioning regimens and peripheral blood stem cell source only, 2013-2017.**

| <b>Covariates</b>     | <b>N</b> | <b>HR (95% CI)</b> | <b>p-value</b> |
|-----------------------|----------|--------------------|----------------|
| <b><u>OS</u></b>      |          |                    |                |
| Main effect           |          |                    | 0.07           |
| Haploidentical        | 164      | Reference          |                |
| 7/8 HLA-matched UD    | 131      | 1.39 (0.97-1.98)   | 0.07           |
| <b><u>LFS</u></b>     |          |                    |                |
| Main effect           |          |                    | 0.40           |
| Haploidentical        | 159      | Reference          |                |
| 7/8 HLA-matched UD    | 129      | 1.16 (0.82-1.63)   | 0.40           |
| <b><u>NRM</u></b>     |          |                    |                |
| Main effect           |          |                    | 0.010          |
| Haploidentical        | 159      | Reference          |                |
| 7/8 HLA-matched UD    | 129      | 1.88 (1.16-3.03)   | 0.010          |
| <b><u>Relapse</u></b> |          |                    |                |
| Main effect           |          |                    | 0.32           |
| Haploidentical        | 159      | Reference          |                |
| 7/8 HLA-matched UD    | 129      | 0.78 (0.47-1.28)   | 0.32           |

**Supplemental Table 9. Multivariate sensitivity analysis for umbilical cord blood (UCB) vs. haploidentical HCT, myeloablative conditioning regimens and peripheral blood stem cell source only, 2013-2017.**

| <b>Covariates</b>                 | <b>N</b> | <b>HR (95% CI)</b> | <b>p-value</b> |
|-----------------------------------|----------|--------------------|----------------|
| <b><u>OS</u></b>                  |          |                    |                |
| UCB vs. haploidentical ≤18 months |          | 1.88 (1.26-2.80)   | 0.002          |
| UCB vs. haploidentical >18 months |          | 0.62 (0.26-1.51)   | 0.29           |
| <b><u>LFS</u></b>                 |          |                    |                |
| UCB vs. haploidentical ≤18 months |          | 1.54 (1.07-2.20)   | 0.02           |
| UCB vs. haploidentical >18 months |          | 0.59 (0.26-1.32)   | 0.20           |
| <b><u>NRM</u></b>                 |          |                    |                |
| Main effect                       |          |                    | 0.001          |
| Haploidentical                    | 159      | Reference          |                |
| UCB                               | 217      | 2.24 (1.37-3.66)   | 0.001          |
| <b><u>Relapse</u></b>             |          |                    |                |
| Main effect                       |          |                    | 0.27           |
| Haploidentical                    | 159      | Reference          |                |
| UCB                               | 217      | 0.76 (0.47-1.23)   | 0.27           |

**Supplemental Table 10. Multivariate sensitivity analysis for matched-sibling donor (MSD) vs. haploidentical HCT, United States centers only, 2013-2017.**

| <b>Covariates</b>     | <b>N</b> | <b>HR (95% CI)</b> | <b>p-value</b> |
|-----------------------|----------|--------------------|----------------|
| <b><u>OS</u></b>      |          |                    |                |
| Main effect           |          |                    | 0.26           |
| Haploidentical        | 356      | Reference          |                |
| MSD                   | 1113     | 1.12 (0.92-1.37)   | 0.26           |
| <b><u>LFS</u></b>     |          |                    |                |
| Main effect           |          |                    | 0.70           |
| Haploidentical        | 344      | Reference          |                |
| MSD                   | 1101     | 1.04 (0.87-1.24)   | 0.70           |
| <b><u>NRM</u></b>     |          |                    |                |
| Main effect           |          |                    | 0.25           |
| Haploidentical        | 344      | Reference          |                |
| MSD                   | 1101     | 1.20 (0.88-1.63)   | 0.25           |
| <b><u>Relapse</u></b> |          |                    |                |
| Main effect           |          |                    | 0.47           |
| Haploidentical        | 344      | Reference          |                |
| MSD                   | 1101     | 0.92 (0.75-1.14)   | 0.47           |



**Supplemental Table 11. Multivariate sensitivity analysis for 8/8 HLA-matched unrelated donor (MUD) vs. haploidentical HCT, United States centers only, 2013-2017.**

| <b>Covariates</b>     | <b>N</b> | <b>HR (95% CI)</b> | <b>p-value</b> |
|-----------------------|----------|--------------------|----------------|
| <b><u>OS</u></b>      |          |                    |                |
| Main effect           |          |                    | 0.05           |
| Haploidentical        | 356      | Reference          |                |
| MUD                   | 1501     | 1.23 (1.00-1.50)   | 0.05           |
| <b><u>LFS</u></b>     |          |                    |                |
| Main effect           |          |                    | 0.73           |
| Haploidentical        | 344      | Reference          |                |
| MUD                   | 1482     | 1.03 (0.86-1.23)   | 0.73           |
| <b><u>NRM</u></b>     |          |                    |                |
| Main effect           |          |                    | 0.001          |
| Haploidentical        | 344      | Reference          |                |
| MUD                   | 1482     | 1.67 (1.23-2.28)   | 0.001          |
| <b><u>Relapse</u></b> |          |                    |                |
| Main effect           |          |                    | 0.02           |
| Haploidentical        | 344      | Reference          |                |
| MUD                   | 1482     | 0.76 (0.61-0.96)   | 0.02           |

**Supplemental Table 12. Multivariate sensitivity analysis for 7/8 HLA-matched unrelated donor vs. haploidentical HCT, United States centers only, 2013-2017.**

| <b>Covariates</b>     | <b>N</b> | <b>HR (95% CI)</b> | <b>p-value</b> |
|-----------------------|----------|--------------------|----------------|
| <b><u>OS</u></b>      |          |                    |                |
| Main effect           |          |                    | 0.03           |
| Haploidentical        | 356      | Reference          |                |
| 7/8 HLA-matched UD    | 203      | 1.34 (1.02-1.75)   | 0.03           |
| <b><u>LFS</u></b>     |          |                    |                |
| Main effect           |          |                    | 0.19           |
| Haploidentical        | 344      | Reference          |                |
| 7/8 HLA-matched UD    | 200      | 1.19 (0.92-1.55)   | 0.19           |
| <b><u>NRM</u></b>     |          |                    |                |
| Main effect           |          |                    | < 0.001        |
| Haploidentical        | 344      | Reference          |                |
| 7/8 HLA-matched UD    | 200      | 2.21 (1.52-3.23)   | < 0.001        |
| <b><u>Relapse</u></b> |          |                    |                |
| Main effect           |          |                    | 0.10           |
| Haploidentical        | 344      | Reference          |                |
| 7/8 HLA-matched UD    | 200      | 0.74 (0.51-1.06)   | 0.10           |

**Supplemental Table 13. Multivariate sensitivity analysis for umbilical cord blood (UCB) vs. haploidentical HCT, United States centers only, 2013-2017.**

| <b>Covariates</b>                 | <b>N</b> | <b>HR (95% CI)</b> | <b>p-value</b> |
|-----------------------------------|----------|--------------------|----------------|
| <b><u>OS</u></b>                  |          |                    |                |
| UCB vs. haploidentical ≤18 months |          | 1.96 (1.46-2.63)   | < 0.001        |
| UCB vs. haploidentical >18 months |          | 0.69 (0.39-1.24)   | 0.22           |
| <b><u>LFS</u></b>                 |          |                    |                |
| UCB vs. haploidentical ≤18 months |          | 1.42 (1.10-1.84)   | 0.007          |
| UCB vs. haploidentical >18 months |          | 0.56 (0.30-1.04)   | 0.07           |
| <b><u>NRM</u></b>                 |          |                    |                |
| Main effect                       |          |                    | < 0.001        |
| Haploidentical                    | 344      | Reference          |                |
| UCB                               | 265      | 2.25 (1.53-3.31)   | < 0.001        |
| <b><u>Relapse</u></b>             |          |                    |                |
| Main effect                       |          |                    | 0.18           |
| Haploidentical                    | 344      | Reference          |                |
| UCB                               | 265      | 0.80 (0.58-1.11)   | 0.18           |

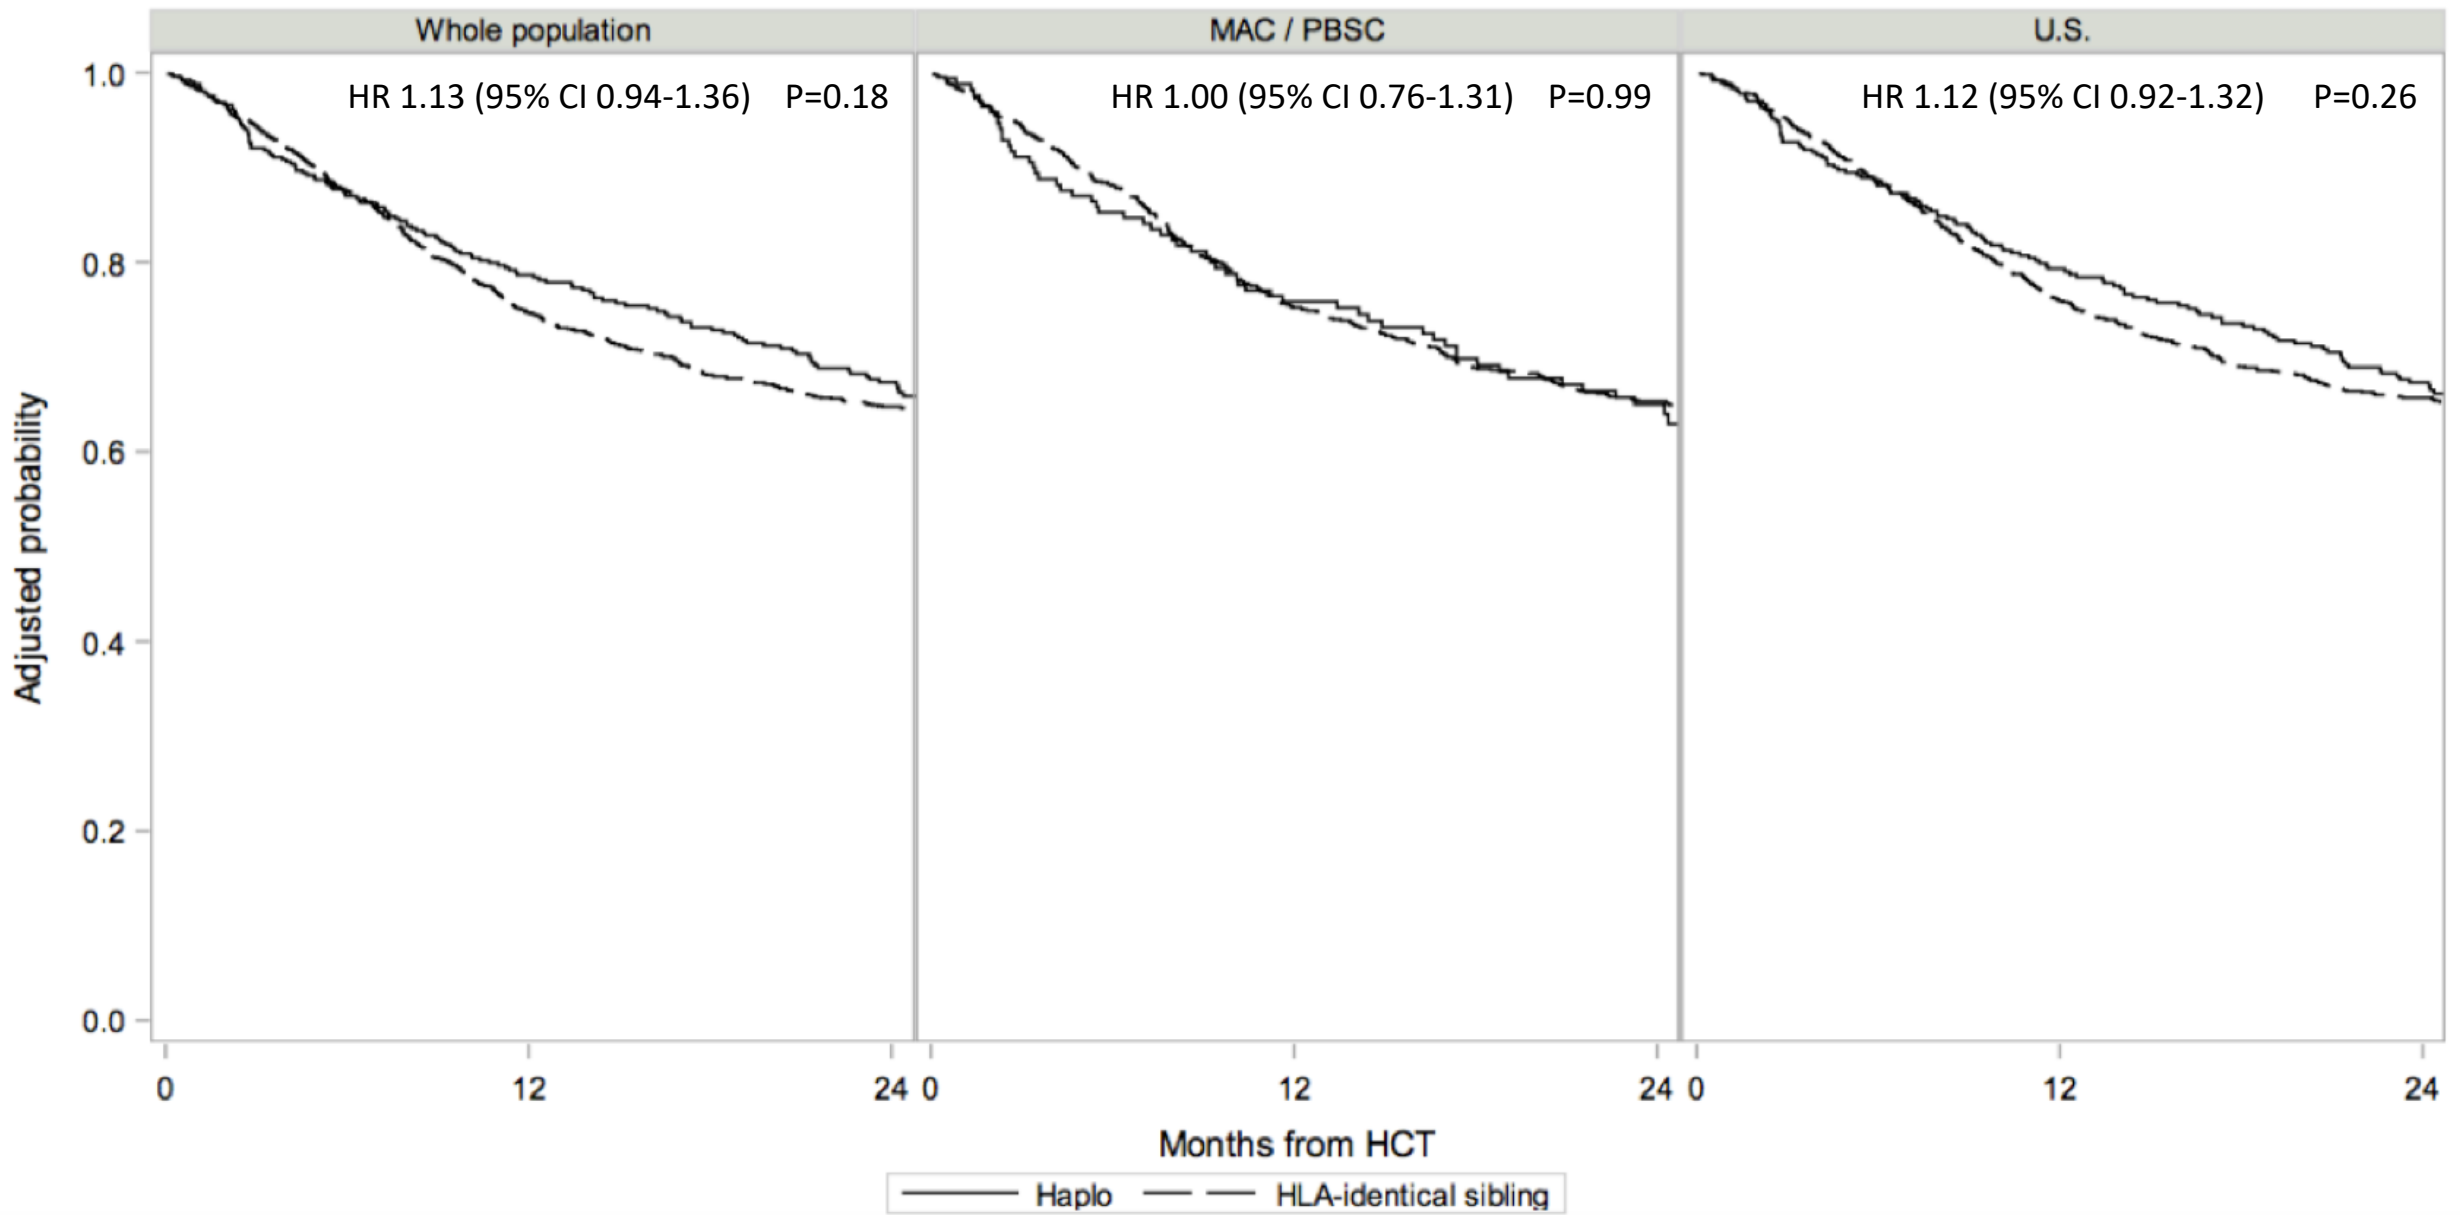

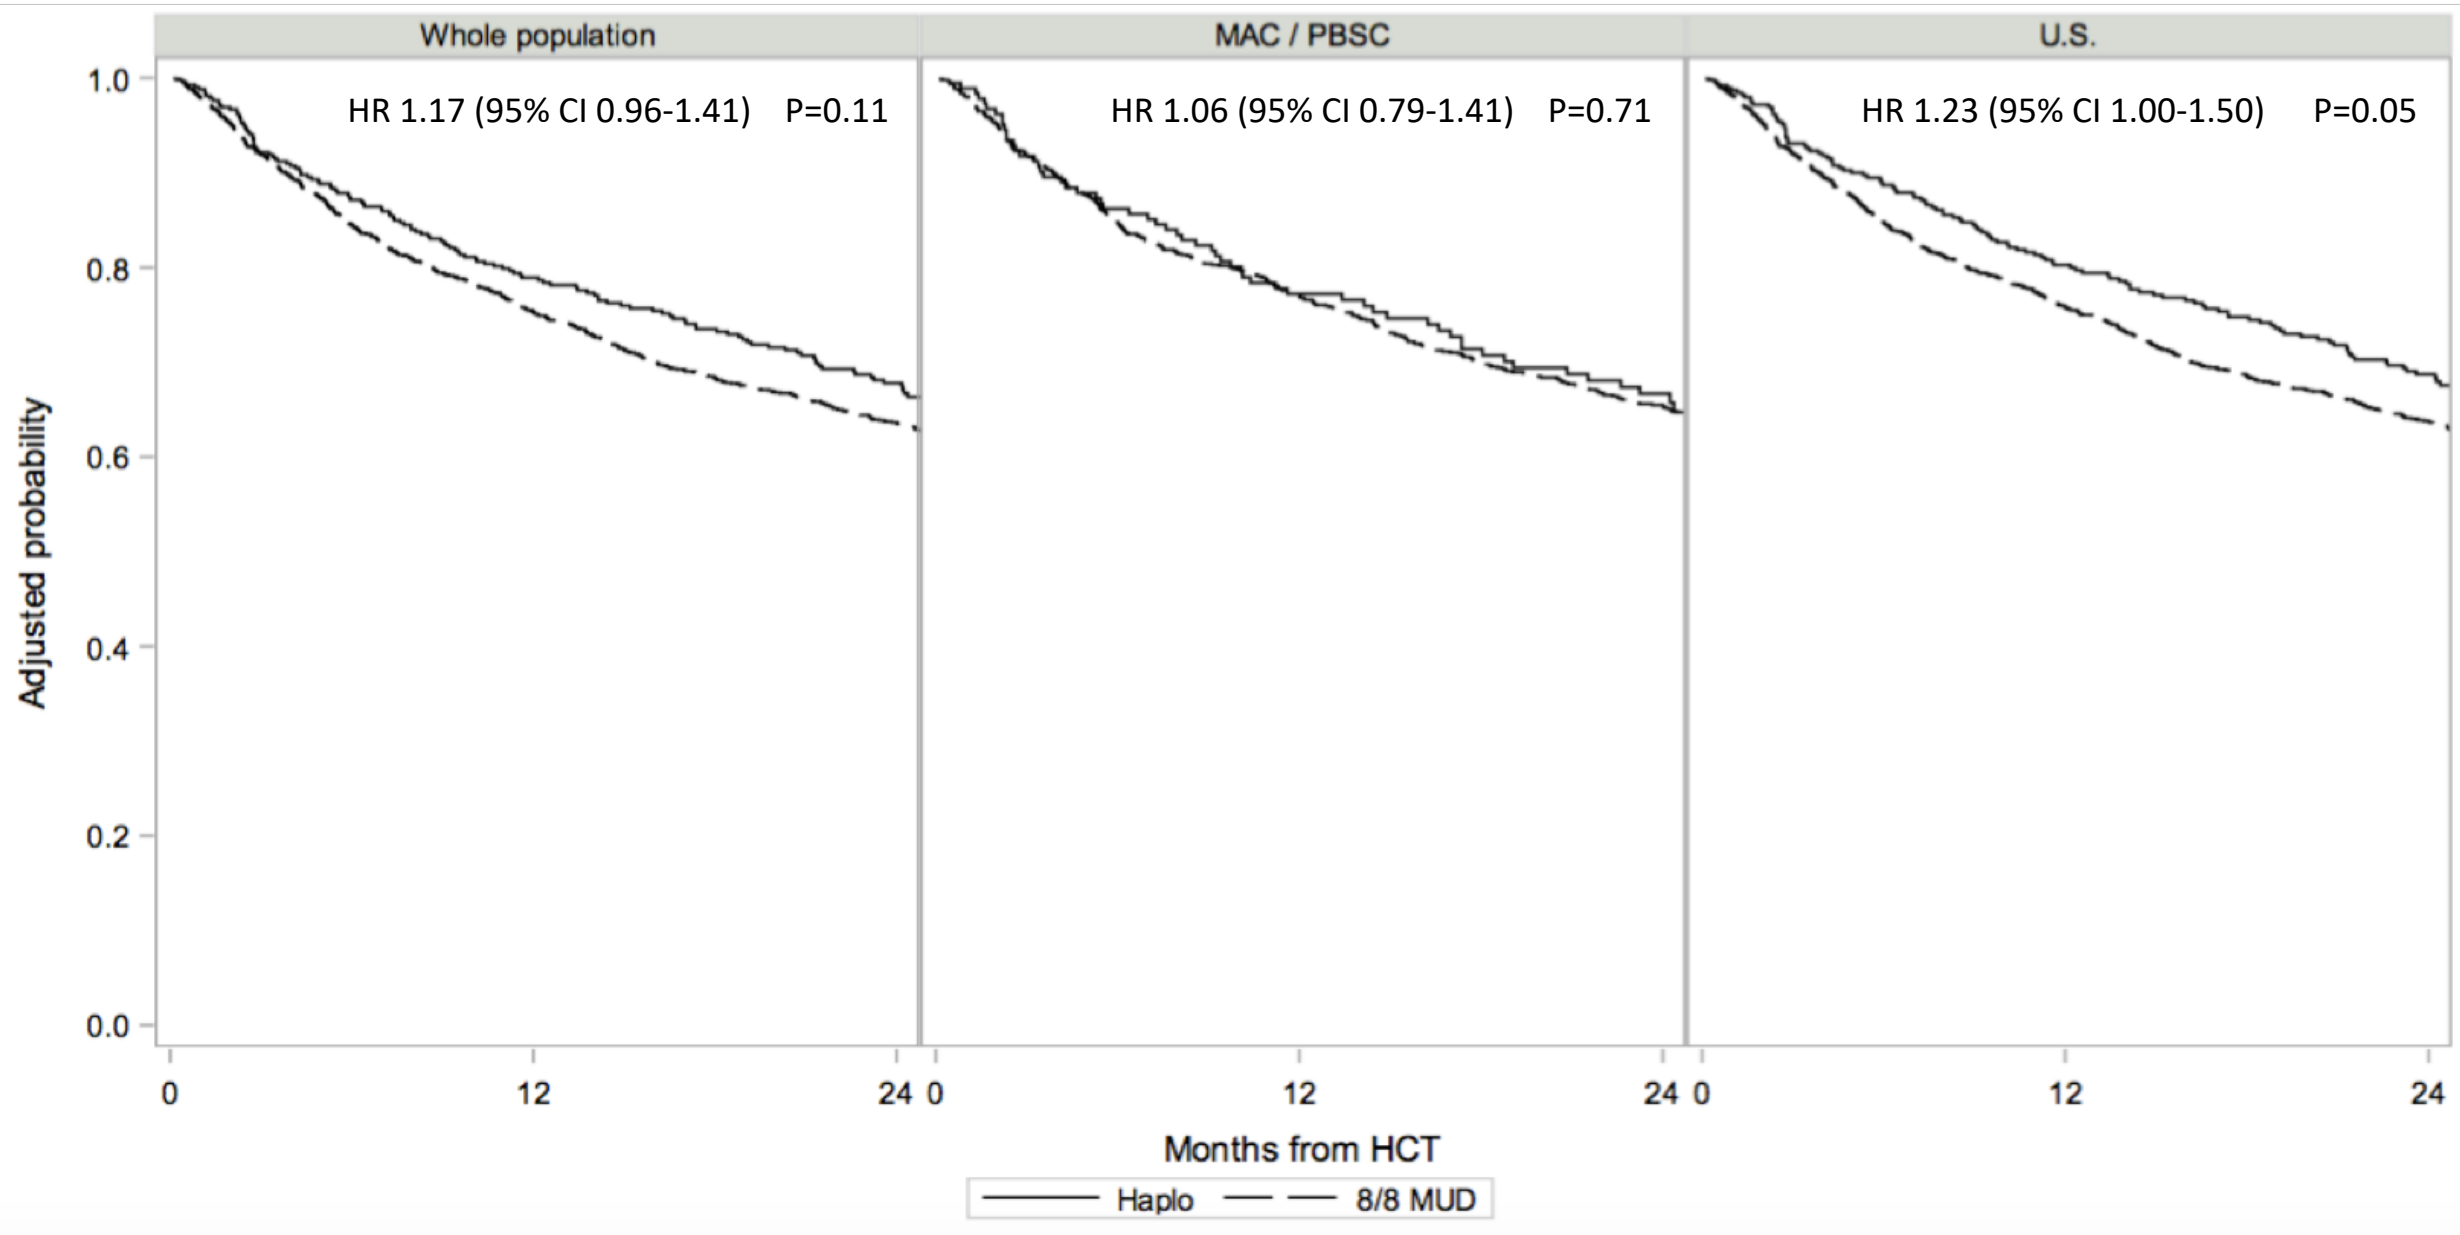

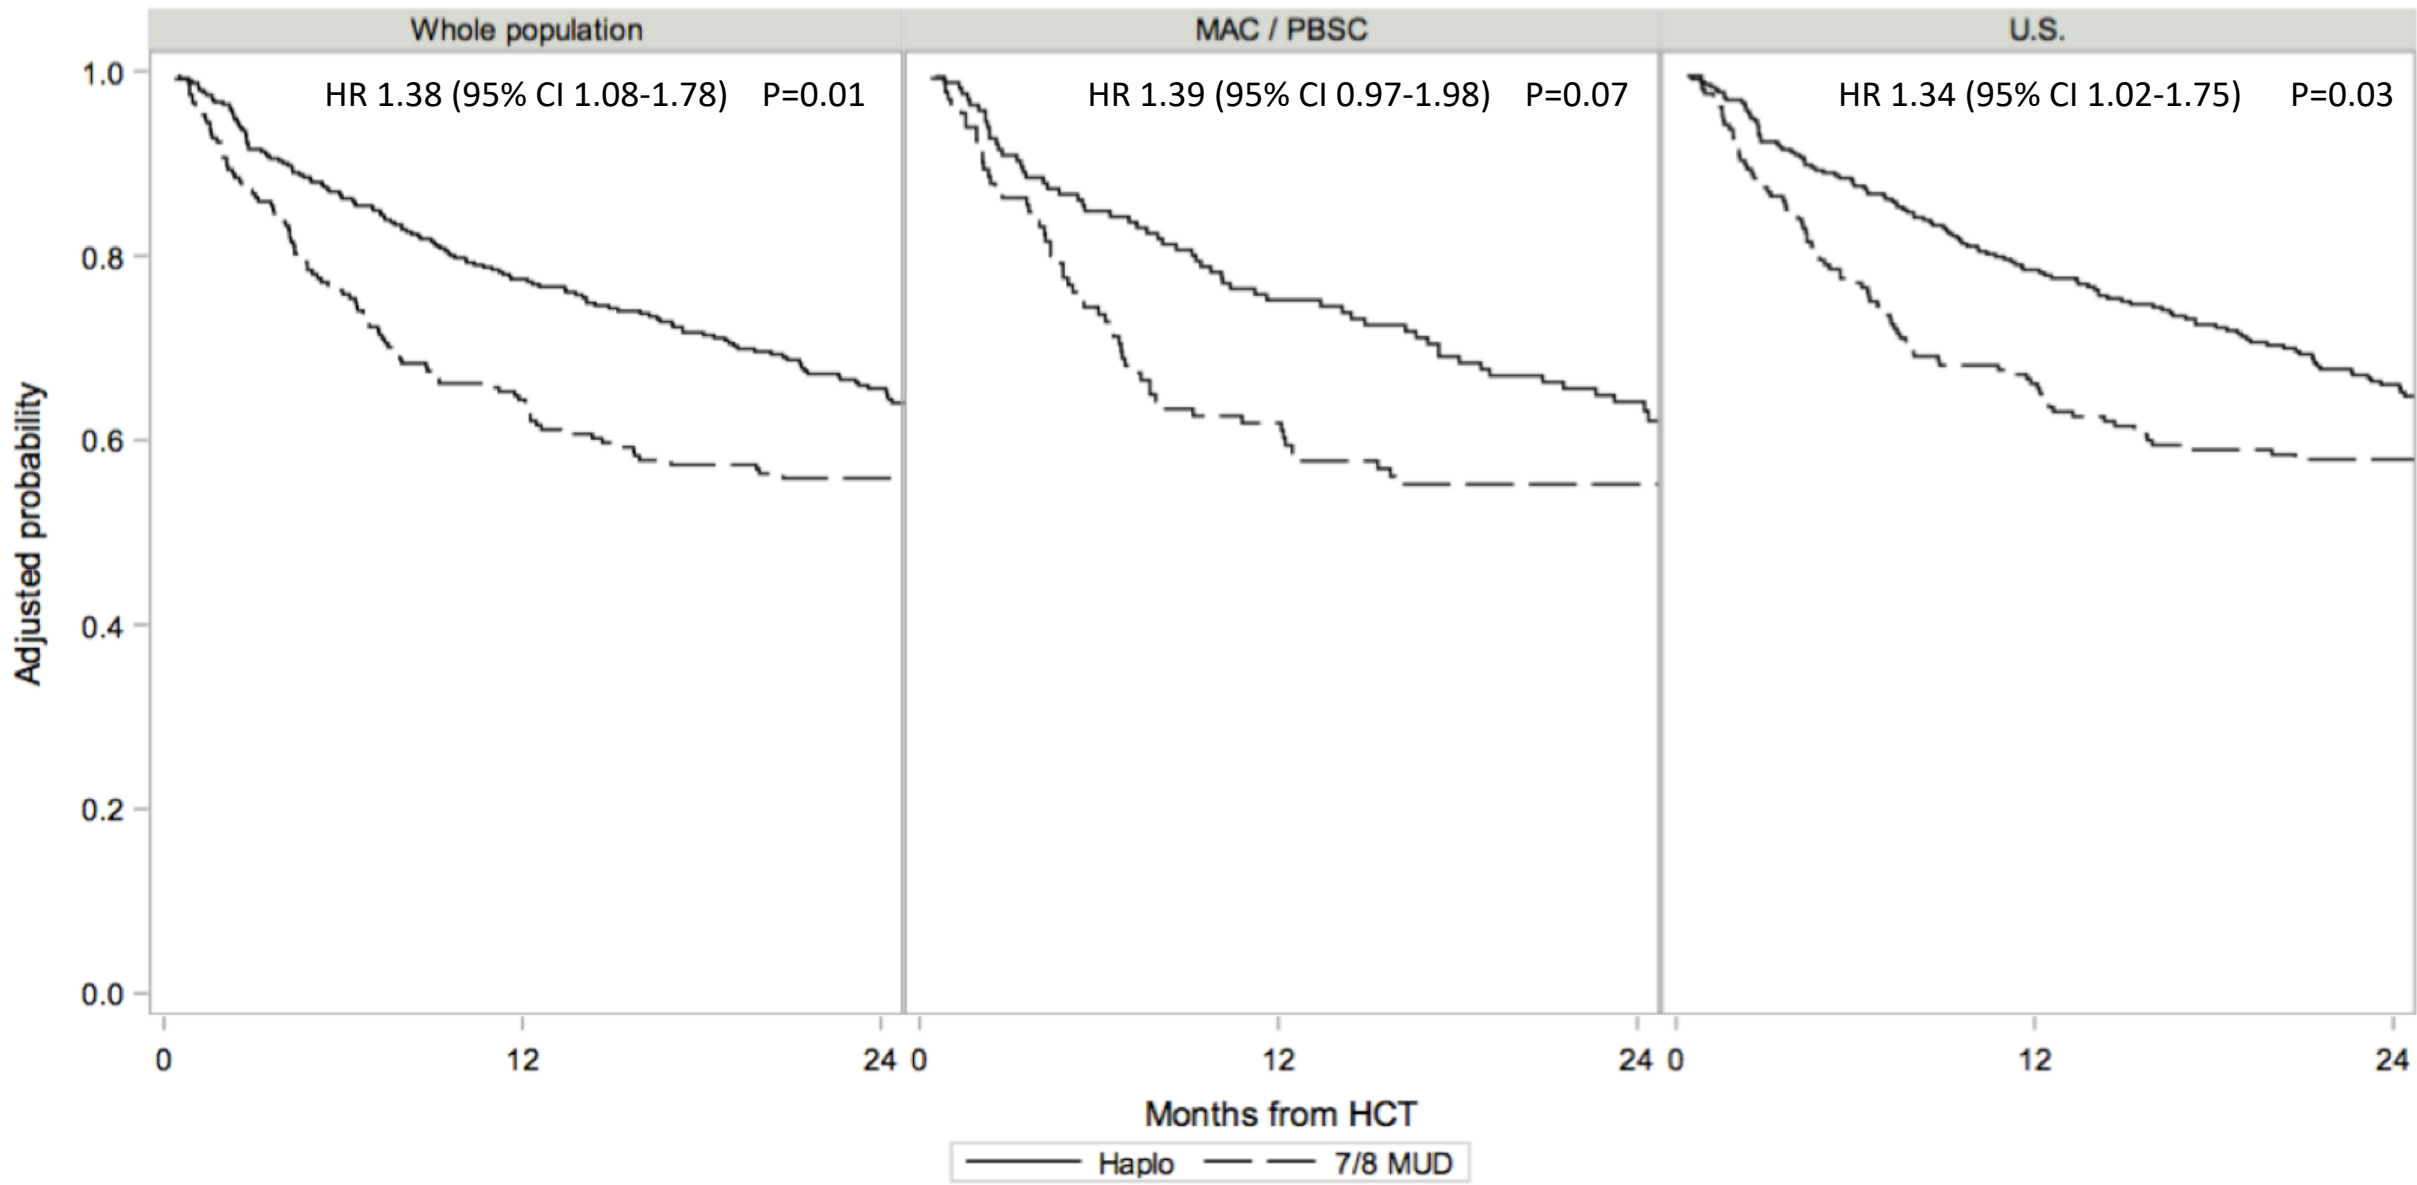

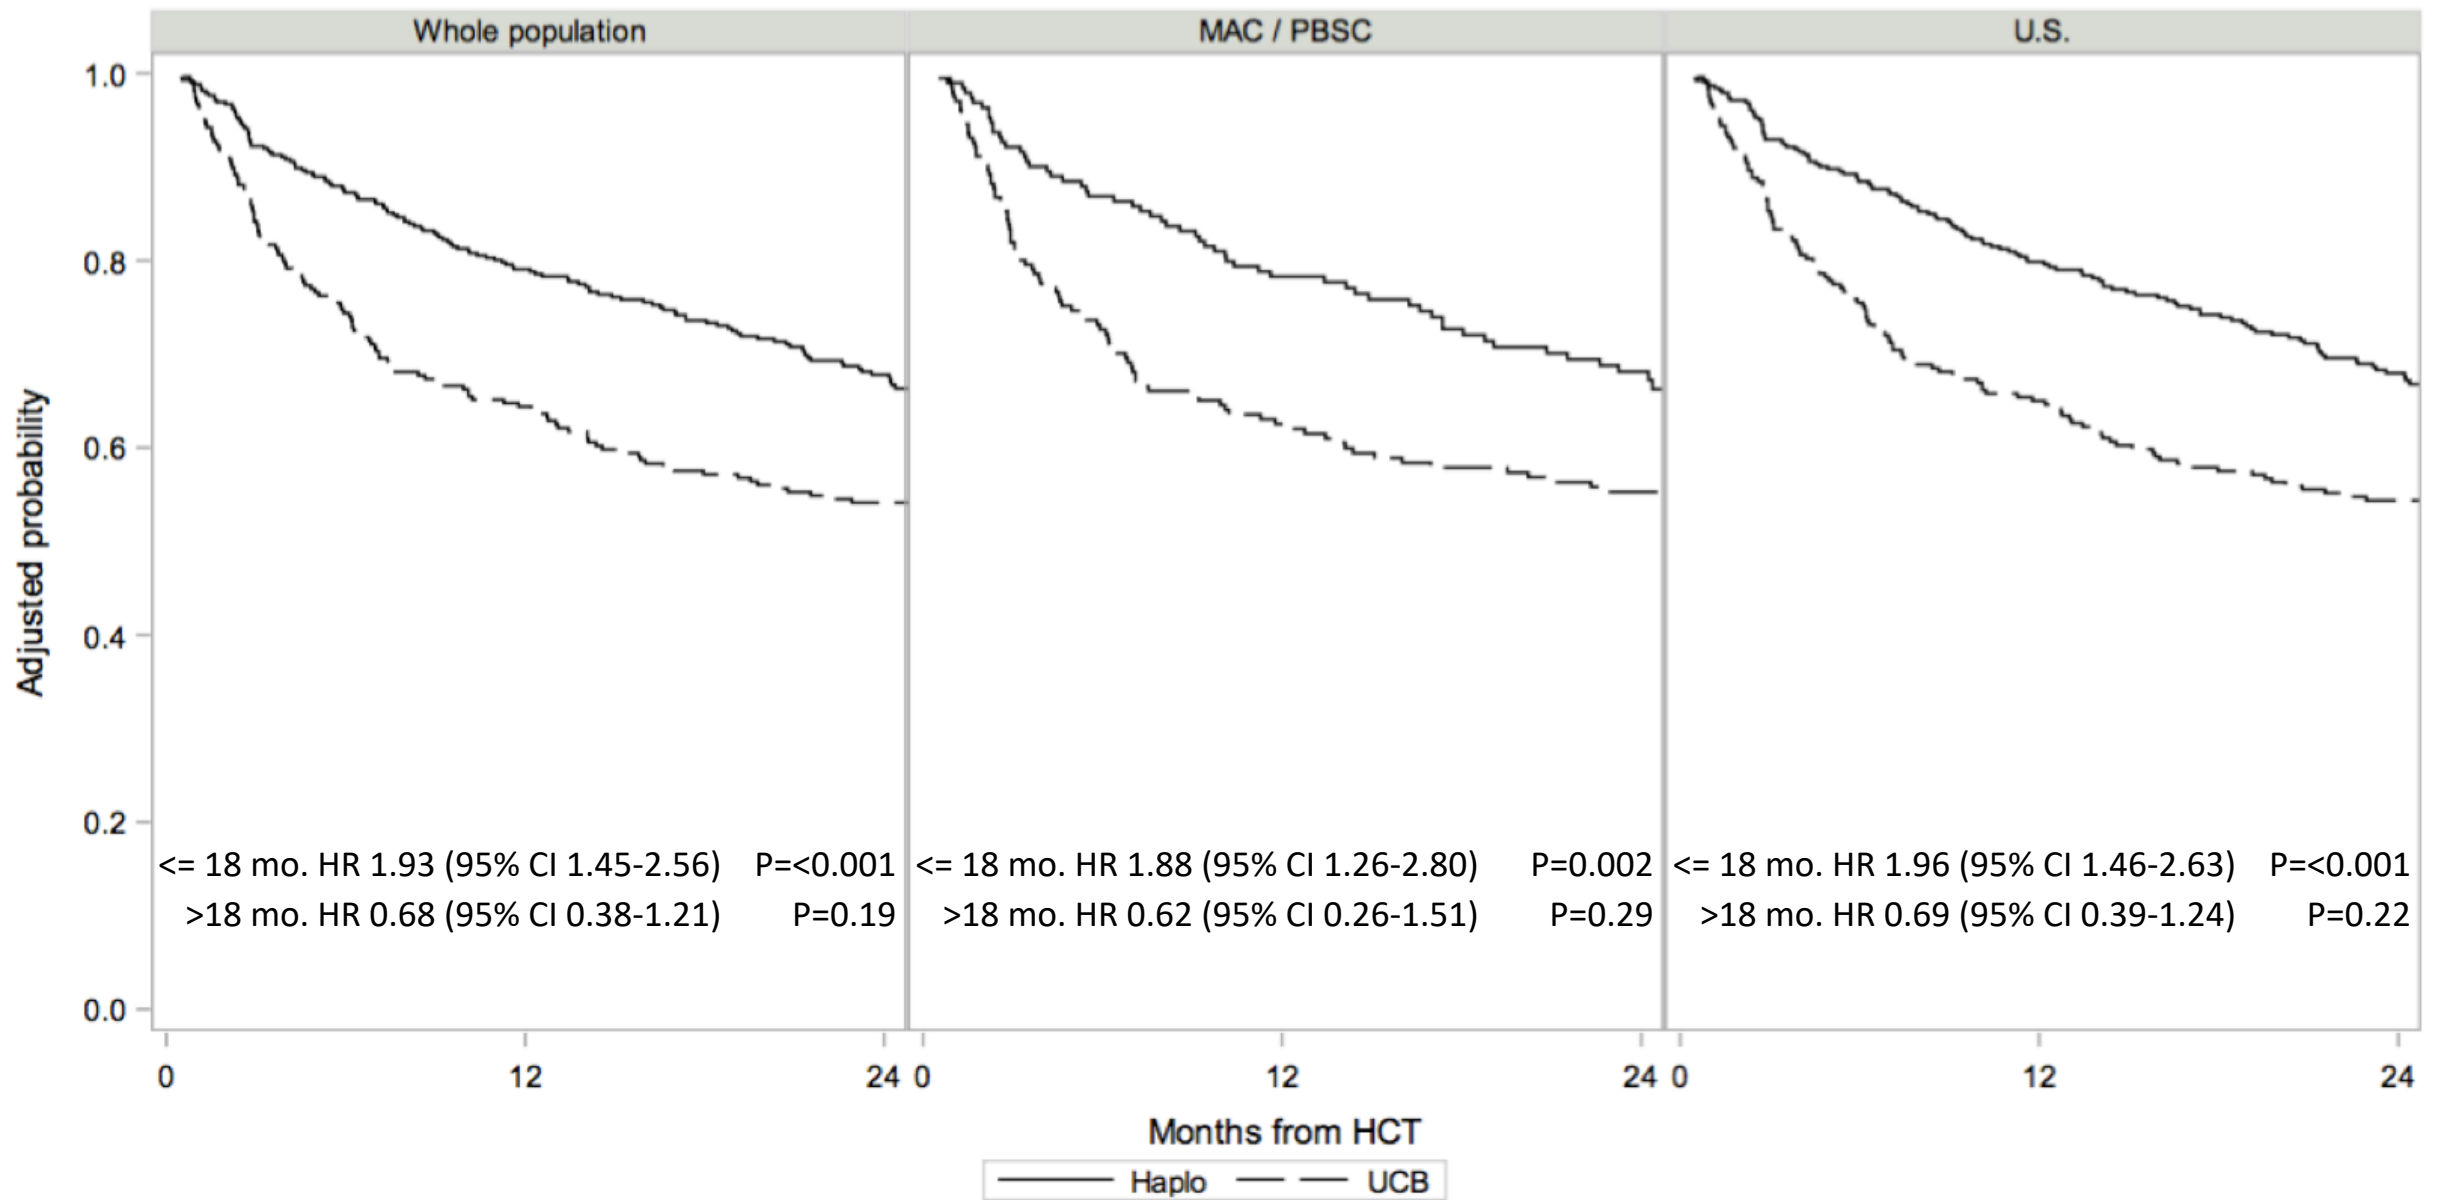

Supplement: advancesADV2021004916-suppl1.pdf [file advancesADV2021004916-suppl1.pdf]
